# Supplementary material for: Serious adverse events and lifetime risk of reoperation after elective shoulder replacement: population based cohort study using hospital episode statistics for England
Source: PubMed Central journal article supplement — BMJ. 2019 Feb 20;364:l298. doi: 10.1136/bmj.l298 (PMC6380386; doi:10.1136/bmj.l298), 2019-02-20
Supplement: crar047835.ww1.pdf [file crar047835.ww1.pdf]

## Supplementary tables

Table 1: All-cause mortality and serious adverse events by age and sex. †Mortality based on patients undergoing surgery 2012-2017 only.

| Age (years)                              | Sex    | Number at risk | Number of events | 30-days Incidence % (95% CI) | Number of events | 90-days Incidence % (95% CI) |
|------------------------------------------|--------|----------------|------------------|------------------------------|------------------|------------------------------|
| <b>Mortality†</b>                        |        |                |                  |                              |                  |                              |
| 50-64                                    | Male   | 1865           | 2                | 0.11% (0.03 to 0.43)         | 4                | 0.21% (0.08 to 0.57)         |
| 65-74                                    |        | 2898           | 3                | 0.10% (0.03 to 0.32)         | 9                | 0.31% (0.16 to 0.60)         |
| 75-84                                    |        | 2175           | 10               | 0.46% (0.25 to 0.85)         | 17               | 0.78% (0.49 to 1.26)         |
| 85+                                      |        | 305            | 12               | 3.93% (2.23 to 6.93)         | 17               | 5.57% (3.46 to 8.97)         |
| 50-64                                    | Female | 2311           | 1                | 0.04% (0.01 to 0.31)         | 3                | 0.13% (0.04 to 0.40)         |
| 65-74                                    |        | 6603           | 7                | 0.11% (0.05 to 0.22)         | 12               | 0.18% (0.10 to 0.32)         |
| 75-84                                    |        | 7410           | 10               | 0.13% (0.07 to 0.25)         | 25               | 0.34% (0.23 to 0.50)         |
| 85+                                      |        | 1444           | 13               | 0.90% (0.52 to 1.55)         | 31               | 2.15% (1.51 to 3.05)         |
| <b>Myocardial infarction</b>             |        |                |                  |                              |                  |                              |
| 50-64                                    | Male   | 4758           | 4                | 0.08% (0.03 to 0.22)         | 9                | 0.19% (0.10 to 0.36)         |
| 65-74                                    |        | 6309           | 9                | 0.14% (0.07 to 0.27)         | 16               | 0.25% (0.16 to 0.41)         |
| 75-84                                    |        | 4270           | 12               | 0.28% (0.16 to 0.49)         | 24               | 0.56% (0.38 to 0.84)         |
| 85+                                      |        | 637            | 7                | 1.10% (0.52 to 2.31)         | 9                | 1.41% (0.74 to 2.72)         |
| 50-64                                    | Female | 6660           | 2                | 0.03% (0.01 to 0.12)         | 3                | 0.05% (0.01 to 0.14)         |
| 65-74                                    |        | 15258          | 24               | 0.16% (0.11 to 0.23)         | 26               | 0.17% (0.12 to 0.25)         |
| 75-84                                    |        | 16716          | 41               | 0.25% (0.18 to 0.33)         | 52               | 0.31% (0.24 to 0.41)         |
| 85+                                      |        | 3446           | 22               | 0.64% (0.42 to 0.97)         | 22               | 0.64% (0.42 to 0.97)         |
| <b>Pulmonary embolism</b>                |        |                |                  |                              |                  |                              |
| 50-64                                    | Male   | 4758           | 6                | 0.13% (0.06 to 0.28)         | 9                | 0.19% (0.10 to 0.36)         |
| 65-74                                    |        | 6309           | 6                | 0.10% (0.04 to 0.21)         | 10               | 0.16% (0.09 to 0.29)         |
| 75-84                                    |        | 4270           | 12               | 0.28% (0.16 to 0.49)         | 17               | 0.40% (0.25 to 0.64)         |
| 85+                                      |        | 637            | 4                | 0.63% (0.24 to 1.67)         | 4                | 0.63% (0.24 to 1.67)         |
| 50-64                                    | Female | 6660           | 10               | 0.15% (0.08 to 0.28)         | 14               | 0.21% (0.12 to 0.35)         |
| 65-74                                    |        | 15258          | 24               | 0.16% (0.11 to 0.23)         | 33               | 0.22% (0.15 to 0.30)         |
| 75-84                                    |        | 16716          | 36               | 0.22% (0.16 to 0.30)         | 55               | 0.33% (0.25 to 0.43)         |
| 85+                                      |        | 3446           | 8                | 0.23% (0.12 to 0.46)         | 14               | 0.41% (0.24 to 0.69)         |
| <b>Lower respiratory tract infection</b> |        |                |                  |                              |                  |                              |
| 50-64                                    | Male   | 4758           | 35               | 0.74% (0.53 to 1.02)         | 43               | 0.90% (0.67 to 1.22)         |
| 65-74                                    |        | 6309           | 63               | 1.00% (0.78 to 1.28)         | 79               | 1.25% (1.00 to 1.56)         |
| 75-84                                    |        | 4270           | 107              | 2.51% (2.07 to 3.03)         | 140              | 3.28% (2.78 to 3.87)         |
| 85+                                      |        | 637            | 66               | 10.36% (8.14 to 13.19)       | 81               | 12.72% (10.23 to 15.81)      |
| 50-64                                    | Female | 6660           | 57               | 0.86% (0.66 to 1.11)         | 76               | 1.14% (0.91 to 1.43)         |
| 65-74                                    |        | 15258          | 147              | 0.96% (0.82 to 1.13)         | 194              | 1.27% (1.10 to 1.46)         |
| 75-84                                    |        | 16716          | 277              | 1.66% (1.47 to 1.86)         | 356              | 2.13% (1.92 to 2.36)         |
| 85+                                      |        | 3446           | 118              | 3.42% (2.86 to 4.10)         | 141              | 4.09% (3.47 to 4.83)         |
| <b>Acute kidney injury</b>               |        |                |                  |                              |                  |                              |
| 50-64                                    | Male   | 4758           | 23               | 0.48% (0.32 to 0.73)         | 27               | 0.57% (0.39 to 0.83)         |
| 65-74                                    |        | 6309           | 43               | 0.68% (0.51 to 0.92)         | 46               | 0.73% (0.55 to 0.97)         |
| 75-84                                    |        | 4270           | 81               | 1.90% (1.53 to 2.36)         | 87               | 2.04% (1.65 to 2.51)         |
| 85+                                      |        | 637            | 23               | 3.61% (2.40 to 5.43)         | 30               | 4.71% (3.29 to 6.74)         |
| 50-64                                    | Female | 6660           | 13               | 0.20% (0.11 to 0.34)         | 20               | 0.30% (0.19 to 0.47)         |
| 65-74                                    |        | 15258          | 83               | 0.54% (0.44 to 0.67)         | 101              | 0.66% (0.54 to 0.80)         |
| 75-84                                    |        | 16716          | 149              | 0.89% (0.76 to 1.05)         | 183              | 1.09% (0.95 to 1.27)         |
| 85+                                      |        | 3446           | 60               | 1.74% (1.35 to 2.24)         | 71               | 2.06% (1.63 to 2.60)         |
| <b>Urinary tract infection</b>           |        |                |                  |                              |                  |                              |
| 50-64                                    | Male   | 4758           | 12               | 0.25% (0.14 to 0.44)         | 15               | 0.32% (0.19 to 0.52)         |
| 65-74                                    |        | 6309           | 32               | 0.51% (0.36 to 0.72)         | 50               | 0.79% (0.60 to 1.05)         |
| 75-84                                    |        | 4270           | 48               | 1.12% (0.85 to 1.49)         | 71               | 1.66% (1.32 to 2.10)         |
| 85+                                      |        | 637            | 23               | 3.61% (2.40 to 5.43)         | 31               | 4.87% (3.42 to 6.92)         |
| 50-64                                    | Female | 6660           | 27               | 0.41% (0.28 to 0.59)         | 38               | 0.57% (0.42 to 0.78)         |
| 65-74                                    |        | 15258          | 102              | 0.67% (0.55 to 0.81)         | 145              | 0.95% (0.81 to 1.12)         |
| 75-84                                    |        | 16716          | 226              | 1.35% (1.19 to 1.54)         | 309              | 1.85% (1.65 to 2.07)         |
| 85+                                      |        | 3446           | 123              | 3.57% (2.99 to 4.26)         | 150              | 4.35% (3.71 to 5.11)         |
| <b>Cerebrovascular event</b>             |        |                |                  |                              |                  |                              |
| 50-64                                    | Male   | 4758           | 4                | 0.08% (0.03 to 0.22)         | 6                | 0.13% (0.06 to 0.28)         |
| 65-74                                    |        | 6309           | 9                | 0.14% (0.07 to 0.27)         | 14               | 0.22% (0.13 to 0.37)         |
| 75-84                                    |        | 4270           | 12               | 0.28% (0.16 to 0.49)         | 23               | 0.54% (0.36 to 0.81)         |
| 85+                                      |        | 637            | 3                | 0.47% (0.15 to 1.46)         | 4                | 0.63% (0.24 to 1.67)         |
| 50-64                                    | Female | 6660           | 0                | 0.00% (0.00 to 0.00)         | 0                | 0.00% (0.00 to 0.00)         |
| 65-74                                    |        | 15258          | 8                | 0.05% (0.03 to 0.10)         | 23               | 0.15% (0.10 to 0.23)         |
| 75-84                                    |        | 16716          | 30               | 0.18% (0.13 to 0.26)         | 47               | 0.28% (0.21 to 0.37)         |
| 85+                                      |        | 3446           | 15               | 0.44% (0.26 to 0.72)         | 20               | 0.58% (0.37 to 0.90)         |

## Supplementary tables

Table 2: Estimates of lifetime risk of implant revision or any further shoulder operation, stratified by age and sex

| Age (years) | Sex    | Lifetime risk of implant revision | Lifetime risk of any further shoulder surgery |
|-------------|--------|-----------------------------------|-----------------------------------------------|
| 50-54       | Male   | 19.34% (18.93 to 19.75)           | 29.75% (29.20 to 30.30)                       |
| 55-59       |        | 23.61% (23.20 to 24.02)           | 31.86% (31.36 to 32.37)                       |
| 60-64       |        | 15.86% (15.57 to 16.14)           | 24.22% (23.82 to 24.62)                       |
| 65-69       |        | 12.94% (12.75 to 13.13)           | 20.36% (20.09 to 20.64)                       |
| 70-74       |        | 10.55% (10.38 to 10.73)           | 16.94% (16.64 to 17.24)                       |
| 75-79       |        | 8.03% (7.89 to 8.17)              | 13.14% (12.86 to 13.43)                       |
| 80-84       |        | 7.06% (6.88 to 7.24)              | 9.08% (8.83 to 9.32)                          |
| 85+         |        | 3.81% (3.65 to 3.97)              | 4.37% (4.20 to 4.55)                          |
| 50-54       | Female | 19.79% (19.41 to 20.18)           | 28.01% (27.52 to 28.49)                       |
| 55-59       |        | 19.02% (18.72 to 19.31)           | 27.87% (27.47 to 28.27)                       |
| 60-64       |        | 15.20% (15.00 to 15.41)           | 22.61% (22.30 to 22.91)                       |
| 65-69       |        | 12.42% (12.25 to 12.59)           | 19.41% (19.16 to 19.67)                       |
| 70-74       |        | 9.28% (9.18 to 9.37)              | 14.08% (13.89 to 14.27)                       |
| 75-79       |        | 6.42% (6.35 to 6.49)              | 9.88% (9.75 to 10.01)                         |
| 80-84       |        | 4.25% (4.18 to 4.31)              | 7.63% (7.44 to 7.83)                          |
| 85+         |        | 2.68% (2.62 to 2.75)              | 3.70% (3.59 to 3.80)                          |

## Supplementary tables

Table 3: Estimated revision risk at 3, 5, 10 and 15 years stratified by age and sex. Risk calculated as 1 minus Kaplan Meier survival function. Presented in table as total number of cases performed, estimate, 95% confidence intervals and number remaining at risk (n)

| Age (years) | Total cases | Male                           |                                  |                                  |                                  |
|-------------|-------------|--------------------------------|----------------------------------|----------------------------------|----------------------------------|
|             |             | 3 years                        | 5 years                          | 10 years                         | 15 years                         |
| 50-54       | 1013        | 8.91% (7.23 to 10.97)<br>n=695 | 11.57% (9.58 to 13.95)<br>n=529  | 16.37% (13.68 to 19.53)<br>n=229 | 20.58% (16.64 to 25.29)<br>n=67  |
| 55-59       | 1491        | 7.99% (6.63 to 9.61)<br>n=985  | 12.78% (10.96 to 14.87)<br>n=727 | 20.13% (17.53 to 23.07)<br>n=321 | 23.86% (20.39 to 27.82)<br>n=80  |
| 60-64       | 2254        | 7.6% (6.5 to 8.87)<br>n=1525   | 10.43% (9.09 to 11.95)<br>n=1141 | 13.66% (11.94 to 15.61)<br>n=403 | 16.67% (13.96 to 19.83)<br>n=89  |
| 65-69       | 3092        | 6.62% (5.73 to 7.64)<br>n=1952 | 8.97% (7.88 to 10.21)<br>n=1394  | 12.82% (11.28 to 14.55)<br>n=462 | 13.79% (11.96 to 15.87)<br>n=100 |
| 70-74       | 3217        | 6.34% (5.48 to 7.32)<br>n=1934 | 8.48% (7.43 to 9.68)<br>n=1318   | 10.73% (9.36 to 12.28)<br>n=379  | 11.5% (9.80 to 13.47)<br>n=56    |
| 75-79       | 2786        | 6.46% (5.53 to 7.55)<br>n=1560 | 7.68% (6.6 to 8.92)<br>n=1015    | 9.06% (7.61 to 10.78)<br>n=203   | 9.06% (7.61 to 10.78)<br>n=28    |
| 80-84       | 1484        | 5.4% (4.28 to 6.79)<br>n=765   | 7.09% (5.66 to 8.85)<br>n=437    | 8.37% (6.58 to 10.63)<br>n=69    | 8.37% (6.58 to 10.63)<br>n=5     |
| 85+         | 637         | 4.36% (2.93 to 6.47)<br>n=271  | 4.36% (2.93 to 6.47)<br>n=153    | 4.36% (2.93 to 6.47)<br>n=11     | 4.36% (2.93 to 6.47)<br>n=2      |

| Age (years) | Total cases | Female                         |                                  |                                  |                                  |
|-------------|-------------|--------------------------------|----------------------------------|----------------------------------|----------------------------------|
|             |             | 3 years                        | 5 years                          | 10 years                         | 15 years                         |
| 50-54       | 1076        | 7.78% (6.23 to 9.7)<br>n=759   | 11.3% (9.36 to 13.6)<br>n=596    | 16.28% (13.76 to 19.2)<br>n=311  | 19.89% (16.62 to 23.72)<br>n=116 |
| 55-59       | 1942        | 7.71% (6.54 to 9.07)<br>n=1395 | 10.85% (9.41 to 12.48)<br>n=1072 | 16.3% (14.33 to 18.51)<br>n=494  | 19.11% (16.57 to 21.98)<br>n=137 |
| 60-64       | 3642        | 5.99% (5.22 to 6.87)<br>n=2615 | 9.14% (8.15 to 10.24)<br>n=2010  | 13.05% (11.71 to 14.54)<br>n=802 | 15.72% (13.84 to 17.83)<br>n=227 |
| 65-69       | 6306        | 5.39% (4.81 to 6.03)<br>n=4206 | 7.16% (6.47 to 7.92)<br>n=3056   | 10.55% (9.58 to 11.62)<br>n=1176 | 12.67% (11.22 to 14.29)<br>n=260 |
| 70-74       | 8952        | 5.18% (4.71 to 5.71)<br>n=5768 | 6.9% (6.32 to 7.53)<br>n=4162    | 9.12% (8.35 to 9.95)<br>n=1326   | 9.96% (9.00 to 11.01)<br>n=242   |
| 75-79       | 9902        | 4.2% (3.79 to 4.65)<br>n=6259  | 5.51% (5.01 to 6.05)<br>n=4344   | 7.00% (6.33 to 7.72)<br>n=1219   | 7.13% (6.43 to 7.91)<br>n=189    |
| 80-84       | 6814        | 3.24% (2.81 to 3.73)<br>n=4128 | 4.02% (3.52 to 4.59)<br>n=2734   | 4.94% (4.28 to 5.69)<br>n=582    | 4.94% (4.28 to 5.69)<br>n=55     |
| 85+         | 3446        | 2.6% (2.08 to 3.25)<br>n=1966  | 2.89% (2.32 to 3.59)<br>n=1170   | 3.28% (2.59 to 4.16)<br>n=164    | 3.28% (2.59 to 4.16)<br>n=11     |

Supplementary figure 1a:  
Predicted probability of any serious adverse event within 30 days

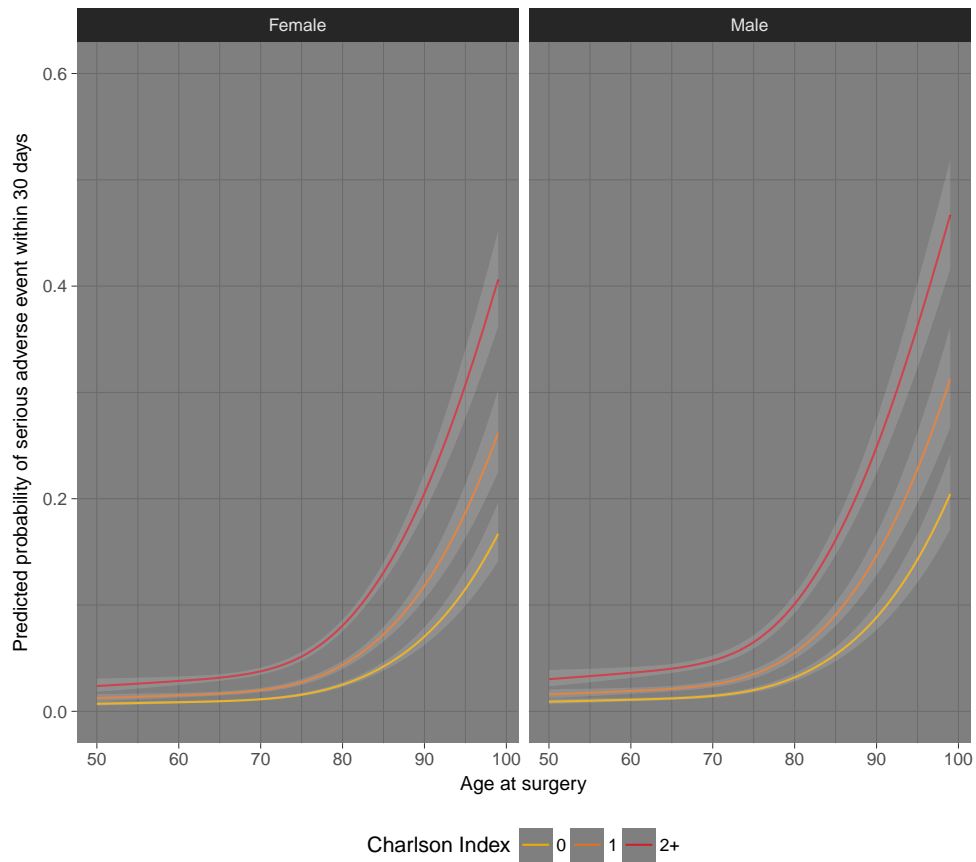

Logistic regression based on 58054 cases, 2045 events. Model validation: c-statistic 0.72, Brier score 0.03

Supplementary figure 1b:  
Predicted probability of any serious adverse event within 90 days

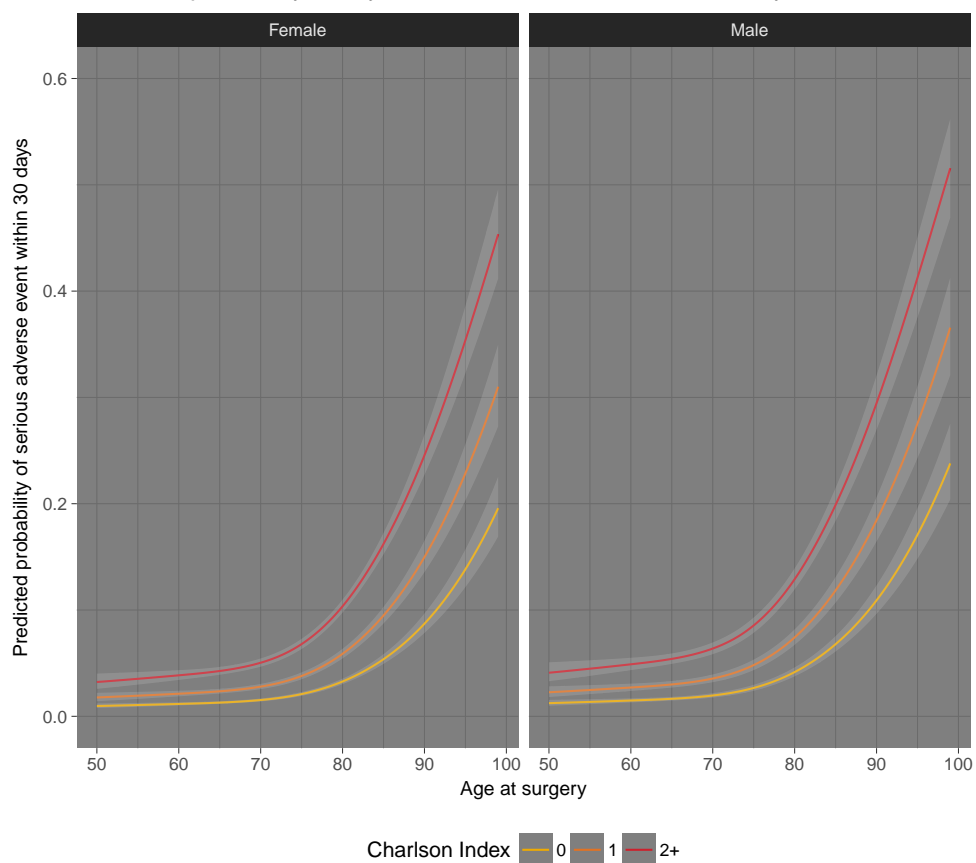

Logistic regression based on 58054 cases, 2677 events. Model validation: c-statistic 0.72, Brier score 0.04

Supplementary methodology notes:

OPCS-4 codes are regularly updated with new codes to reflect evolving medical technology. The standard version used for this study was OPCS-4.7 (mandated for HES use since April 2014). The NHS Technology Reference data Update Distribution provides reference datasets to cross reference these codes to older versions of the OPCS-4. These were applied to the dataset to ensure full capture of relevant cases since 1998. Specifically, in OPCS-4.2, shoulder replacements were identified with the addition of specific anatomy codes. Subsequent to that, standalone shoulder replacement codes are used.

There are 20 diagnosis fields ("DIAG\_") in HES which use the ICD-10 coding system. ICD-10 uses a tree structure for codes with up to 5 digits available in HES. Therefore, diagnoses can be identified with fewer digits if the intention is to include all of the subsequent branches. Primary diagnosis codes were based on the information recorded in the FIRST diagnosis field only. Past medical history was taken into account to identify previous conditions which were highly likely to contribute to the indication for surgery. The following hierarchy was used to apply these in generating the final main indication: 1. Bone tumour, 2. Acute trauma, 3. Previous trauma, 4. Avascular necrosis, 5. Inflammatory, 6. Osteoarthritis and cuff tear arthropathy, 7. Other

The Charlson Comorbidity Index was calculated using the Stata function `-charlson` (Vicki Stagg, 2006. "CHARLSON: Stata module to calculate Charlson index of comorbidity," Statistical Software Components S456719, Boston College Department of Economics, revised 13 Sep 2017).

The following pages of tables describe the relevant OPCS-4 and ICD-10 codes used in this study.

### **Primary procedure codes**

| <b>Main code</b> | <b>Anatomy code</b> |
|------------------|---------------------|
| W431             | Z685                |
| W431             | Z691                |
| W431             | Z814                |
| W431             | Z814                |
| W431             | Z814                |
| W441             | Z814                |
| W441             | Z814                |
| W451             | Z814                |
| W451             | Z814                |
| W491             | n/a                 |
| W494             | n/a                 |
| W501             | n/a                 |
| W504             | n/a                 |
| W511             | n/a                 |
| W515             | n/a                 |
| W581             | Z691                |
| W581             | Z813                |
| W581             | Z814                |
| W961             | n/a                 |
| W965             | n/a                 |
| W971             | n/a                 |
| W975             | n/a                 |
| W981             | n/a                 |
| W986             | n/a                 |
| O061             | n/a                 |
| O071             | n/a                 |
| O081             | n/a                 |

**Revision procedure codes (OPCS-4)**

| Main code | Anatomy code                     |
|-----------|--------------|-----------|--------------|-----------|--------------|-----------|----------------------------------|
| W430      | n/a          | W459      | Z814         | W980      | Z813         | W601      | One of<br>Z813,<br>Z814,<br>Z891 |
| W430      |              | W490      | Z814         | W982      | Z814         | W602      |                                  |
| W430      |              | W492      | Z814         | W983      |              | W603      |                                  |
| W430      |              | W493      | Z814         | W984      |              | W608      |                                  |
| W432      |              | W498      | Z814         | W985      |              | W609      |                                  |
| W432      |              | W499      | Z814         | W987      |              | W611      |                                  |
| W432      |              | W500      | Z814         | W988      |              | W612      |                                  |
| W432      |              | W502      | Z814         | W989      |              | W613      |                                  |
| W433      |              | W503      | Z814         | O060      |              | W618      |                                  |
| W433      |              | W508      | Z814         | O062      |              | W619      |                                  |
| W433      |              | W509      | Z814         | O063      |              | W621      |                                  |
| W433      |              | W510      | Z814         | O068      |              | W622      |                                  |
| W433      |              | W512      | Z814         | O069      |              | W628      |                                  |
| W438      |              | W513      | Z814         | O070      |              | W629      |                                  |
| W438      |              | W514      | Z814         | O072      |              | W631      |                                  |
| W438      |              | W518      | Z814         | O073      |              | W632      |                                  |
| W438      |              | Z685      | W519         | Z814      | O078         | n/a       |                                  |
| W439      | Z691         | W580      |              | O079      |              | W639      |                                  |
| W439      | Z814         | W580      |              | O080      |              | W641      |                                  |
| W439      | Z814         | W580      |              | O082      |              | W642      |                                  |
| W439      | Z685         | W582      |              | O083      |              | W648      |                                  |
| W440      | Z691         | W582      |              | O084      |              | W649      |                                  |
| W442      | Z814         | W582      |              | O088      |              |           |                                  |
| W443      | Z814         | W960      |              | O089      |              |           |                                  |
| W443      | Z685         | W962      | n/a          | X071      |              |           |                                  |
| W448      | Z691         | W963      |              | X072      |              |           |                                  |
| W449      | Z814         | W964      |              | W572      |              |           |                                  |
| W450      | Z814         | W966      |              | W573      |              |           |                                  |
| W452      | Z814         | W968      |              | W574      |              |           |                                  |
| W453      | Z685         | W969      |              | W575      |              |           |                                  |
| W453      | Z691         | W970      |              | W579      |              |           |                                  |
| W454      | Z814         | W972      |              | Y037      |              |           |                                  |
| W454      | Z814         | W973      |              |           |              |           |                                  |
| W454      | Z685         | W974      | Z691         |           |              |           |                                  |
| W454      | Z691         | W976      | Z813         |           |              |           |                                  |
| W454      | Z814         | W978      | Z814         |           |              |           |                                  |
| W458      | Z814         | W979      | Z691         |           |              |           |                                  |



### Reoperation procedure codes (OPCS-4)

| Procedure description                     | Main code | Anatomy code     | Notes                 |
|-------------------------------------------|-----------|------------------|-----------------------|
| Subacromial decompression or ACJ excision | O291      |                  |                       |
|                                           | W572      | Z812, Z814       | Z814 only before 2009 |
|                                           | W844      | Z812, Z814, Z891 |                       |
|                                           | T621      | Z814, Z891       |                       |
|                                           | T622      |                  |                       |
|                                           | T626      |                  |                       |
|                                           | T628      |                  |                       |
| T629                                      |           |                  |                       |
| Rotator cuff repair                       | T791      |                  |                       |
|                                           | T793      |                  |                       |
|                                           | T794      |                  |                       |
|                                           | T795      |                  |                       |
|                                           | T641      | Z742             |                       |
|                                           | T642      |                  |                       |
|                                           | T643      |                  |                       |
|                                           | T744      |                  |                       |
|                                           | T648      |                  |                       |
|                                           | T649      |                  |                       |
|                                           | T67       |                  |                       |
|                                           | T68       |                  |                       |
| Relocation of dislocated prosthesis       | W652      | Z813, Z814, Z891 |                       |
|                                           | W658      |                  |                       |
|                                           | W689      |                  |                       |
|                                           | W662      |                  |                       |
|                                           | W668      |                  |                       |
|                                           | W669      |                  |                       |
|                                           | W672      |                  |                       |
|                                           | W674      |                  |                       |
|                                           | W678      |                  |                       |
| W679                                      |           |                  |                       |
| Stabilisation procedure                   | O27       |                  |                       |
|                                           | W77       |                  | Not W776              |
|                                           | W841      |                  |                       |
|                                           | W842      |                  |                       |
|                                           | W72       | Z813, Z814, Z891 |                       |
|                                           | W73       |                  |                       |
|                                           | W74       |                  |                       |
| W75                                       |           |                  |                       |

### Reoperation procedure codes (OPCS-4) - continued

| Procedure description                                   | Main code | Anatomy code           | Notes    |
|---------------------------------------------------------|-----------|------------------------|----------|
| MUA +/- capsular release                                | W911      | Z813,<br>Z814,<br>Z891 |          |
|                                                         | W913      |                        |          |
|                                                         | W918      |                        |          |
|                                                         | W919      |                        |          |
|                                                         | W781      |                        |          |
|                                                         | W784      |                        |          |
|                                                         | Y421      |                        |          |
|                                                         | Y428      |                        |          |
|                                                         | Y429      |                        |          |
| Fracture fixation<br>(excluding prosthesis<br>revision) | W19       | Z691,                  | Not W191 |
|                                                         | W20       | Z692,                  |          |
|                                                         | W21       | Z693,                  |          |
|                                                         | W22       | Z813,                  |          |
|                                                         | W23       | Z814,                  |          |
|                                                         | W24       | Z891                   | Not W241 |
|                                                         | W25       |                        |          |
|                                                         | W26       |                        |          |
|                                                         | W651      |                        |          |
|                                                         | W653      |                        |          |
|                                                         | W654      |                        |          |
|                                                         | W656      |                        |          |
|                                                         | W661      |                        |          |
|                                                         | W663      |                        |          |
|                                                         | W664      |                        |          |
|                                                         | W671      |                        |          |
|                                                         | W673      |                        |          |
|                                                         | W677      |                        |          |
|                                                         | W332      |                        |          |
|                                                         | O172      |                        |          |
| O173                                                    |           |                        |          |
| O175                                                    |           |                        |          |
| O178                                                    |           |                        |          |
| O179                                                    |           |                        |          |
| Synovectomy                                             | W691      | Z813,<br>Z814,<br>Z891 |          |
|                                                         | W692      |                        |          |
|                                                         | W693      |                        |          |
|                                                         | T711      |                        |          |

### Primary indication codes

| Indication      | Primary ICD-10 code | ICD-10 codes in patient history | OPCS-4 codes in patient history |                  |
|-----------------|---------------------|---------------------------------|---------------------------------|------------------|
|                 |                     |                                 | Main code                       | Anatomy code     |
|                 | <b>EITHER</b>       | <b>OR</b>                       | <b>OR</b>                       |                  |
| Tumour          | C795                |                                 |                                 |                  |
|                 | C400                |                                 |                                 |                  |
|                 | M122                |                                 |                                 |                  |
|                 | C81                 |                                 |                                 |                  |
|                 | C82                 |                                 |                                 |                  |
|                 | C83                 |                                 |                                 |                  |
|                 | C84                 |                                 |                                 |                  |
|                 | C85                 |                                 |                                 |                  |
|                 | C90                 |                                 |                                 |                  |
|                 | D160                |                                 |                                 |                  |
|                 | C764                |                                 |                                 |                  |
| Acute trauma    | S420                |                                 |                                 |                  |
|                 | S421                |                                 |                                 |                  |
|                 | S422                |                                 |                                 |                  |
|                 | S427                |                                 |                                 |                  |
|                 | S429                |                                 |                                 |                  |
|                 | S430                |                                 |                                 |                  |
|                 | S431                |                                 |                                 |                  |
|                 | S434                |                                 |                                 |                  |
|                 | S435                |                                 |                                 |                  |
| Previous trauma | M125                | S420                            | O27                             |                  |
|                 | M191                | S421                            | W77                             | Not W776         |
|                 | T846                | S422                            | W841                            |                  |
|                 | M8721               | S427                            | W842                            |                  |
|                 | M8722               | S429                            | W72                             | Z813, Z814, Z891 |
|                 | M8401               | S430                            | W73                             |                  |
|                 | M8402               | S431                            | W74                             |                  |
|                 | M8411               | S434                            | W75                             |                  |
|                 | M8412               | S435                            | W652                            |                  |
|                 |                     |                                 | W658                            |                  |
|                 |                     |                                 | W689                            |                  |
|                 |                     |                                 | W662                            |                  |
|                 |                     |                                 | W668                            |                  |
|                 |                     |                                 | W669                            |                  |
|                 |                     |                                 | W672                            |                  |
|                 |                     |                                 | W674                            |                  |
|                 |                     |                                 | W678                            |                  |
|                 |                     | W679                            |                                 |                  |

**Primary indication codes - continued**

| Indication               | Primary ICD-10 code | ICD-10 codes in patient history | OPCS-4 codes in patient history |              |
|--------------------------|---------------------|---------------------------------|---------------------------------|--------------|
|                          |                     |                                 | Main code                       | Anatomy code |
|                          | <b>EITHER</b>       | <b>OR</b>                       | <b>OR</b>                       |              |
| AVN                      | M8701               |                                 |                                 |              |
|                          | M8702               |                                 |                                 |              |
|                          | M8711               |                                 |                                 |              |
|                          | M8712               |                                 |                                 |              |
|                          | M8731               |                                 |                                 |              |
|                          | M8732               |                                 |                                 |              |
|                          | M8741               |                                 |                                 |              |
|                          | M8742               |                                 |                                 |              |
|                          | M8751               |                                 |                                 |              |
|                          | M8752               |                                 |                                 |              |
|                          | M8761               |                                 |                                 |              |
|                          | M8762               |                                 |                                 |              |
|                          | M9051               |                                 |                                 |              |
|                          | M9052               |                                 |                                 |              |
| Inflammatory             | M02                 |                                 |                                 |              |
|                          | M03                 |                                 |                                 |              |
|                          | M05                 |                                 |                                 |              |
|                          | M06                 |                                 |                                 |              |
|                          | M07                 |                                 |                                 |              |
|                          | M08                 |                                 |                                 |              |
|                          | M09                 |                                 |                                 |              |
|                          | M10                 |                                 |                                 |              |
|                          | M11                 |                                 |                                 |              |
|                          | M12                 |                                 |                                 |              |
| OA/Cuff Tear arthropathy | M15                 |                                 | T791                            |              |
|                          | M19                 |                                 | T793                            |              |
|                          | S460                |                                 | T794                            |              |
|                          | M751                |                                 | T795                            |              |
|                          |                     |                                 | T641                            | Z742         |
|                          |                     |                                 | T642                            |              |
|                          |                     |                                 | T643                            |              |
|                          |                     |                                 | T744                            |              |
|                          |                     |                                 | T648                            |              |
|                          |                     |                                 | T649                            |              |
|                          |                     |                                 | T67                             |              |
|                          |                     |                                 | T68                             |              |

### Serious systemic complications

| Condition                         | ICD-10 code          | Descriptor                                                                   |
|-----------------------------------|----------------------|------------------------------------------------------------------------------|
|                                   |                      |                                                                              |
| Pulmonary embolism                | I26                  | Pulmonary embolism                                                           |
|                                   |                      |                                                                              |
| Myocardial infarction             | I21                  | Acute myocardial infarction                                                  |
|                                   | I22                  | Subsequent myocardial infarction                                             |
|                                   |                      |                                                                              |
| Lower respiratory tract infection | J12                  | Viral pneumonia, not elsewhere classified                                    |
|                                   | J13                  | Pneumonia due to Streptococcus pneumoniae                                    |
|                                   | J14                  | Pneumonia due to Haemophilus influenzae                                      |
|                                   | J15                  | Bacterial pneumonia, not elsewhere classified                                |
|                                   | J16                  | Pneumonia due to other infectious organisms, not elsewhere classified        |
|                                   | J18                  | Pneumonia, organism unspecified                                              |
|                                   | J22                  | Unspecified acute lower respiratory infection                                |
|                                   | J86                  | Pyothorax                                                                    |
|                                   | J440                 | Chronic obstructive pulmonary disease with acute lower respiratory infection |
|                                   | J851                 | Abscess of lung with pneumonia                                               |
| J690                              | Aspiration pneumonia |                                                                              |
|                                   |                      |                                                                              |
| Acute kidney injury               | N17                  | Acute renal failure                                                          |
|                                   |                      |                                                                              |
| Urinary tract infection           | N10                  | Acute tubulo-interstitial nephritis                                          |
|                                   | N300                 | Acute cystitis                                                               |
|                                   | N308                 | Other cystitis                                                               |
|                                   | N309                 | Cystitis, unspecified                                                        |
|                                   | N390                 | Urinary tract infection, site not specified                                  |
|                                   |                      |                                                                              |
| Cerebrovascular event             | I60                  | Subarachnoid haemorrhage                                                     |
|                                   | I61                  | Intracerebral haemorrhage                                                    |
|                                   | I62                  | Other nontraumatic intracranial haemorrhage                                  |
|                                   | I63                  | Cerebral infarction                                                          |
|                                   | I64                  | Stroke, not specified as haemorrhage or infarction                           |
